# Supplementary material for: Psycho-Cognitive Profile and NGF and BDNF Levels in Tears and Serum: A Pilot Study in Patients with Graves’ Disease
Source: MDPI journal article supplement (doi:10.3390/ijms24098074), 2023-04-29
Supplement: s1 [file s1]

## Supplementary data

**Table S1.** CANTAB descriptive statistics.

|                                     | Group     | Mean  | SD   | T-test |    |              |
|-------------------------------------|-----------|-------|------|--------|----|--------------|
|                                     |           |       |      | t      | df | p            |
| PAL-TE (Total Error adjusted)       | HC (n=10) | 10.2  | 3    | -2.115 | 28 | <b>0.043</b> |
|                                     | GO (n=20) | 19.4  | 13.4 |        |    |              |
| PAL-TE6 (TE six shapes adjusted)    | HC        | 3.2   | 1.8  | -1.806 | 28 | 0.082        |
|                                     | GO        | 7.5   | 7.3  |        |    |              |
| PAL – FT (First trial memory score) | HC        | 17.0  | 1.6  | 0.084  | 28 | 0.0933       |
|                                     | GO        | 16.9  | 3.5  |        |    |              |
| PAL – MT (mean of Tentative)        | HC        | 1.3   | 0.1  | -3.108 | 28 | <b>0.004</b> |
|                                     | GO        | 1.9   | 0.6  |        |    |              |
| SWM - BE (Between errors Total)     | HC        | 14.8  | 5.7  | -2.206 | 28 | <b>0.036</b> |
|                                     | GO        | 26.0  | 15.4 |        |    |              |
| SWM - S (Strategy)                  | HC        | 33.6  | 4.8  | 0.411  | 28 | 0.684        |
|                                     | GO        | 32.8  | 5.1  |        |    |              |
| RVP -A                              | HC        | 0.9   | 0.03 | 3.029  | 28 | <b>0.005</b> |
|                                     | GO        | 0.8   | 0.03 |        |    |              |
| RVP - ML (Mean latency)             | HC        | 500.0 | 94.5 | 1.230  | 28 | 0.229        |
|                                     | GO        | 459.4 | 82.1 |        |    |              |

**Table S2.** TCI descriptive statistics.

| Temperaments  |       |       |       |       |              |       | Characters     |                |        |       |       |              |       |       |
|---------------|-------|-------|-------|-------|--------------|-------|----------------|----------------|--------|-------|-------|--------------|-------|-------|
|               | Group | Mean  | SD    | t     | T-test<br>df | p     |                | Group          | Mean   | SD    | t     | T-test<br>df | p     |       |
| TCI-NS1       | HC    | 5.800 | 2.616 | -1.05 | 28           | 0.323 | TCI-SD1        | HC             | 7.400  | 0.516 | 1.33  | 28           | 0.192 |       |
|               | GO    | 6.800 | 2.546 |       |              |       |                | GO             | 6.800  | 1.361 |       |              |       |       |
| TCI-NS2       | HC    | 2.810 | 1.529 | -2.74 | 28           | 0.011 | TCI-SD2        | HC             | 5.200  | 1.229 | 0.92  | 28           | 0.362 |       |
|               | GO    | 5.500 | 2.911 |       |              |       |                | GO             | 4.600  | 1.847 |       |              |       |       |
| TCI-NS3       | HC    | 5.000 | 1.333 | 1.39  | 28           | 0.174 | TCI-SD3        | HC             | 3.600  | 1.430 | -1.74 | 28           | 0.092 |       |
|               | GO    | 4.000 | 2.052 |       |              |       |                | GO             | 4.400  | 1.046 |       |              |       |       |
| TCI-NS4       | HC    | 4.000 | 0.667 | -0.95 | 28           | 0.346 | TCI-SD4        | HC             | 6.200  | 1.033 | 0.58  | 28           | 0.561 |       |
|               | GO    | 4.810 | 2.609 |       |              |       |                | GO             | 5.600  | 3.119 |       |              |       |       |
| TCI-NS<br>TOT | HC    | 17.60 | 3.373 | -1.40 | 28           | 0.170 | TCI-SD5        | HC             | 10.40  | 1.838 | 1.39  | 28           | 0.173 |       |
|               | GO    | 21.10 | 7.433 |       |              |       |                | GO             | 9.200  | 2.375 |       |              |       |       |
| TCI-HA1       | HC    | 3.800 | 2.044 | -0.62 | 28           | 0.534 | TCI-SD-<br>TOT | HC             | 32.80  | 2.150 | 1.01  | 28           | 0.319 |       |
|               | GO    | 4.300 | 2.055 |       |              |       |                | GO             | 30.50  | 6.947 |       |              |       |       |
| TCI-HA2       | HC    | 4.400 | 1.430 | 0.41  | 28           | 0.679 | TCI-C1         | HC             | 7.000  | 1.155 | 1.43  | 28           | 0.163 |       |
|               | GO    | 4.100 | 2.024 |       |              |       |                | GO             | 5.900  | 2.269 |       |              |       |       |
| TCI-HA3       | HC    | 3.800 | 2.044 | 1.55  | 28           | 0.131 | TCI-C2         | HC             | 6.800  | 0.422 | 5.14  | 28           | <.001 |       |
|               | GO    | 2.605 | 1.951 |       |              |       |                | GO             | 4.100  | 1.619 |       |              |       |       |
| TCI-HA4       | HC    | 2.400 | 0.843 | 0.21  | 28           | 0.831 | TCI-C3         | HC             | 7.400  | 0.843 | 3.24  | 28           | 0.003 |       |
|               | GO    | 2.225 | 2.482 |       |              |       |                | GO             | 6.200  | 1.005 |       |              |       |       |
| TCI-HA<br>TOT | HC    | 14.40 | 5.797 | 0.53  | 28           | 0.597 | TCI-C4         | HC             | 9.400  | 1.265 | 1.69  | 28           | 0.101 |       |
|               | GO    | 13.20 | 5.800 |       |              |       |                | GO             | 8.200  | 2.042 |       |              |       |       |
| TCI-RD1       | HC    | 7.800 | 1.229 | 1.90  | 28           | 0.068 | TCI-C5         | HC             | 8.200  | 0.422 | 3.24  | 28           | 0.003 |       |
|               | GO    | 6.600 | 1.789 |       |              |       |                | GO             | 7.000  | 1.124 |       |              |       |       |
| TCI-RD2       | HC    | 7.000 | 0.943 | 4.60  | 28           | <.001 | TCI-C<br>TOT   | HC             | 38.80  | 2.044 | 3.69  | 28           | <.001 |       |
|               | GO    | 4.300 | 1.720 |       |              |       |                | GO             | 31.300 | 6.208 |       |              |       |       |
| TCI-RD3       | HC    | 4.400 | 1.075 | 3.56  | 28           | 0.001 | TCI-ST1        | HC             | 4.400  | 2.459 | -1.29 | 28           | 0.207 |       |
|               | GO    | 2.800 | 1.196 |       |              |       |                | GO             | 5.900  | 3.227 |       |              |       |       |
| TCI-RD<br>TOT | HC    | 19.20 | 2.348 | 4.06  | 28           | <.001 | TCI-ST2        | HC             | 3.200  | 1.229 | -2.20 | 28           | 0.036 |       |
|               | GO    | 13.70 | 3.922 |       |              |       |                | GO             | 4.900  | 2.269 |       |              |       |       |
| TCI-P         | HC    | 2.600 | 1.713 | -3.24 | 28           | 0.003 | TCI-ST3        | HC             | 2.400  | 1.430 | -0.39 | 28           | 0.694 |       |
|               | GO    | 5.000 | 2.000 |       |              |       |                | GO             | 2.700  | 2.155 |       |              |       |       |
|               |       |       |       |       |              |       |                | TCI-ST-<br>TOT | HC     | 10.00 | 2.749 | -1.59        | 28    | 0.122 |
|               |       |       |       |       |              |       |                |                | GO     | 13.50 | 6.605 |              |       |       |

**Table S3.** Correlation between HAM-A and TCI dimensions in GO patients

|          |             |          |          |             |          |         |             |        |
|----------|-------------|----------|----------|-------------|----------|---------|-------------|--------|
| TCINS1   | Pearson's r | 0.386    | TCIRD1   | Pearson's r | 0.617**  | TCIC1   | Pearson's r | -0.221 |
|          | p-value     | 0.093    |          | p-value     | 0.004    |         | p-value     | 0.350  |
| TCINS2   | Pearson's r | 0.524*   | TCIRD2   | Pearson's r | 0.666**  | TCIC2   | Pearson's r | 0.085  |
|          | p-value     | 0.018    |          | p-value     | 0.001    |         | p-value     | 0.723  |
| TCINS3   | Pearson's r | 0.463*   | TCIRD3   | Pearson's r | 0.355    | TCIC3   | Pearson's r | 0.241  |
|          | p-value     | 0.040    |          | p-value     | 0.125    |         | p-value     | 0.305  |
| TCINS4   | Pearson's r | 0.546*   | TCIRDTOT | Pearson's r | 0.682*** | TCIC4   | Pearson's r | 0.263  |
|          | p-value     | 0.013    |          | p-value     | < .001   |         | p-value     | 0.262  |
| TCINSTOT | Pearson's r | 0.658**  | TCIP     | Pearson's r | -0.240   | TCIC5   | Pearson's r | 0.433  |
|          | p-value     | 0.002    |          | p-value     | 0.308    |         | p-value     | 0.057  |
| TCIHA1   | Pearson's r | -0.072   | TCISD1   | Pearson's r | 0.171    | TCICTOT | Pearson's r | 0.159  |
|          | p-value     | 0.764    |          | p-value     | 0.471    |         | p-value     | 0.504  |
| TCIHA2   | Pearson's r | 0.048    | TCISD2   | Pearson's r | 0.320    | TCIT1   | Pearson's r | 0.192  |
|          | p-value     | 0.842    |          | p-value     | 0.169    |         | p-value     | 0.418  |
| TCIHA3   | Pearson's r | -0.618** | TCISD3   | Pearson's r | 0.434    | TCIT2   | Pearson's r | -0.047 |
|          | p-value     | 0.004    |          | p-value     | 0.056    |         | p-value     | 0.844  |
| TCIHA4   | Pearson's r | -0.138   | TCISD4   | Pearson's r | -0.546*  | TCIT3   | Pearson's r | 0.040  |
|          | p-value     | 0.563    |          | p-value     | 0.013    |         | p-value     | 0.868  |
| TCIHATOT | Pearson's r | -0.274   | TCISD5   | Pearson's r | -0.463*  | TCITTOT | Pearson's r | 0.090  |
|          | p-value     | 0.243    |          | p-value     | 0.040    |         | p-value     | 0.704  |
|          |             |          | TCISDTOT | Pearson's r | -0.215   |         |             |        |
|          |             |          |          | p-value     | 0.363    |         |             |        |

\* p &lt; .05, \*\* p &lt; .01, \*\*\* p &lt; .001

**Table S4.** Correlation between NTs expression and CANTAB scores in GO patients.

|           |                | m/proBDNF        |                 | m/proNGF         |                  |
|-----------|----------------|------------------|-----------------|------------------|------------------|
|           |                | Serum            | Tears           | Serum            | Tears            |
| PAL - TE  | Pearsons's r   | <b>0.665**</b>   | <b>0.712**</b>  | <b>-0.536*</b>   | <b>-0.692**</b>  |
|           | p-value        | <b>0.009</b>     | <b>0.002</b>    | <b>0.015</b>     | <b>0.003</b>     |
|           | Spearman's rho | <b>0.371</b>     | 0.559*          | <b>-0.609**</b>  | <b>-0.594**</b>  |
|           | p-value        | <b>0.235</b>     | 0.038           | <b>0.002</b>     | <b>0.025</b>     |
| PAL - TE6 | Pearsons's r   | <b>0.849***</b>  | <b>0.683**</b>  | -0.346           | -0.681**         |
|           | p-value        | <b>&lt; .001</b> | <b>0.004</b>    | 0.136            | 0.004            |
|           | Spearman's rho | <b>0.714**</b>   | <b>0.751*</b>   | -0.400           | -0.892***        |
|           | p-value        | <b>0.009</b>     | <b>0.033</b>    | 0.100            | <b>&lt; .001</b> |
| PAL - FT  | Pearsons's r   | -0.198           | -0.654**        | <b>0.725***</b>  | <b>0.865***</b>  |
|           | p-value        | 0.498            | 0.006           | <b>&lt; .001</b> | <b>&lt; .001</b> |
|           | Spearman's rho | -0.429           | -0.679**        | <b>-0.713**</b>  | <b>-0.655**</b>  |
|           | p-value        | 0.165            | 0.008           | <b>0.004</b>     | <b>0.003</b>     |
| PAL - MT  | Pearsons's r   | 0.457            | 0.632**         | <b>-0.617**</b>  | <b>-0.642**</b>  |
|           | p-value        | 0.100            | 0.009           | <b>0.004</b>     | <b>0.007</b>     |
|           | Spearman's rho | 0.371            | 0.536*          | <b>0.750***</b>  | <b>-0.642*</b>   |
|           | p-value        | 0.235            | 0.048           | <b>&lt; .001</b> | <b>0.013</b>     |
| SWM - BE  | Pearsons's r   | 0.337            | 0.358           | 0.103            | 0.115            |
|           | p-value        | 0.239            | 0.173           | 0.666            | 0.672            |
|           | Spearman's rho | 0.314            | 0.536*          | -0.200           | 0.071            |
|           | p-value        | 0.320            | 0.048           | 0.426            | 0.808            |
| SWM - S   | Pearsons's r   | 0.112            | 0.437           | 0.083            | -0.335           |
|           | p-value        | 0.703            | 0.090           | 0.728            | 0.204            |
|           | Spearman's rho | 0.145            | 0.306           | -0.181           | -0.504           |
|           | p-value        | 0.653            | 0.287           | 0.463            | 0.066            |
| RVP - A   | Pearsons's r   | -0.881***        | -0.162          | -0.173           | 0.217            |
|           | p-value        | <b>&lt; .001</b> | 0.549           | 0.465            | 0.420            |
|           | Spearman's rho | -0.928***        | -0.360          | -0.134           | 0.252            |
|           | p-value        | <b>&lt; .001</b> | 0.206           | 0.595            | 0.385            |
| RVP - ML  | Pearsons's r   | <b>-0.631*</b>   | <b>-0.580*</b>  | -0.223           | -0.259           |
|           | p-value        | <b>0.015</b>     | <b>0.018</b>    | 0.344            | 0.332            |
|           | Spearman's rho | <b>-0.714**</b>  | <b>-0.750**</b> | -0.133           | -0.071           |
|           | p-value        | <b>0.009</b>     | <b>0.002</b>    | 0.598            | 0.898            |

\* p &lt; .05, \*\* p &lt; .01, \*\*\* p &lt; .001.

**Table S5.** Correlation between NTs expression and TCI scores in GO patients.

|              |                       | m/proBDNF         |                 | m/proNGF          |                 |
|--------------|-----------------------|-------------------|-----------------|-------------------|-----------------|
|              |                       | Serum             | Tears           | Serum             | Tears           |
| TCI – NS1    | <i>Pearsons's r</i>   | <b>-0.879***</b>  | <b>-0.779**</b> | -0.132            | 0.225           |
|              | <i>p-value</i>        | <b>&lt; 0.001</b> | <b>0.001</b>    | 0.578             | 0.401           |
|              | <i>Spearman's rho</i> | <b>-0.812**</b>   | <b>-0.703**</b> | 0.034             | 0.180           |
| TCI – NS2    | <i>p-value</i>        | <b>0.001</b>      | <b>0.005</b>    | 0.894             | 0.538           |
|              | <i>Pearsons's r</i>   | -0.206            | 0.461           | <b>-0.706***</b>  | <b>-0.688**</b> |
|              | <i>p-value</i>        | 0.521             | 0.097           | <b>&lt; 0.001</b> | <b>0.003</b>    |
| TCI – NS3    | <i>Spearman's rho</i> | -0.265            | 0.273           | <b>-0.653**</b>   | <b>-0.545*</b>  |
|              | <i>p-value</i>        | 0.406             | 0.345           | <b>&lt; 0.003</b> | <b>0.044</b>    |
|              | <i>Pearsons's r</i>   | -0.648*           | -0.302          | -0.171            | -0.303          |
| TCI – NS4    | <i>p-value</i>        | 0.023             | 0.295           | 0.470             | 0.255           |
|              | <i>Spearman's rho</i> | -0.551            | -0.327          | -0.017            | -0.109          |
|              | <i>p-value</i>        | 0.063             | 0.253           | 0.947             | 0.711           |
| TCI – NS TOT | <i>Pearsons's r</i>   | -0.085            | -0.159          | -0.331            | -0.170          |
|              | <i>p-value</i>        | 0.792             | 0.588           | 0.180             | 0.562           |
|              | <i>Spearman's rho</i> | -0.116            | -0.218          | -0.136            | -0.309          |
| TCI – HA1    | <i>p-value</i>        | 0.720             | 0.454           | 0.590             | 0.283           |
|              | <i>Pearsons's r</i>   | -0.802***         | -0.030          | -0.461            | -0.384          |
|              | <i>p-value</i>        | <b>&lt; 0.001</b> | 0.912           | 0.054             | 0.141           |
| TCI – HA2    | <i>Spearman's rho</i> | -0.771**          | -0.199          | -0.326            | -0.384          |
|              | <i>p-value</i>        | <b>&lt; 0.003</b> | 0.495           | 0.186             | 0.141           |
|              | <i>Pearsons's r</i>   | -0.263            | 0.214           | 0.012             | -0.462          |
| TCI – HA3    | <i>p-value</i>        | 0.363             | 0.432           | 0.961             | 0.071           |
|              | <i>Spearman's rho</i> | 0.029             | 0.200           | -0.068            | -0.381          |
|              | <i>p-value</i>        | 0.929             | 0.493           | 0.788             | 0.178           |
| TCI – HA4    | <i>Pearsons's r</i>   | -0.112            | 0.043           | 0.758***          | 0.154           |
|              | <i>p-value</i>        | 0.702             | 0.875           | <b>&lt; 0.001</b> | 0.568           |
|              | <i>Spearman's rho</i> | -0.058            | 0.180           | 0.726***          | -0.090          |
| TCI – HA TOT | <i>p-value</i>        | 0.858             | 0.538           | <b>&lt; 0.001</b> | 0.760           |
|              | <i>Pearsons's r</i>   | 0.801***          | 0.370           | 0.342             | -0.464          |
|              | <i>p-value</i>        | <b>&lt;0.001</b>  | 0.158           | 0.140             | 0.070           |
| TCI – RD1    | <i>Spearman's rho</i> | 0.754**           | 0.306           | 0.417             | -0.684**        |
|              | <i>p-value</i>        | 0.005             | 0.287           | 0.085             | 0.007           |
|              | <i>Pearsons's r</i>   | -0.315            | -0.204          | 0.099             | -0.433          |
| TCI – RD2    | <i>p-value</i>        | 0.272             | 0.448           | 0.678             | 0.094           |
|              | <i>Spearman's rho</i> | -0.330            | -0.075          | 0.026             | -0.467          |
|              | <i>p-value</i>        | 0.077             | 0.799           | 0.920             | 0.092           |
| TCI – RD3    | <i>Pearsons's r</i>   | 0.035             | 0.152           | 0.427             | -0.467          |
|              | <i>p-value</i>        | 0.904             | 0.573           | 0.060             | 0.119           |
|              | <i>Spearman's rho</i> | 0.143             | 0.429           | 0.267             | -0.678**        |
| TCI – RD TOT | <i>p-value</i>        | 0.658             | 0.126           | 0.285             | 0.008           |
|              | <i>Pearsons's r</i>   | -0.636*           | 0.058           | -0.396            | -0.491          |
|              | <i>p-value</i>        | 0.026             | 0.830           | 0.084             | 0.053           |
| TCI – RD1    | <i>Spearman's rho</i> | -0.647*           | 0.218           | -0.376            | -0.272          |
|              | <i>p-value</i>        | 0.023             | 0.454           | 0.124             | 0.346           |
| TCI – RD2    | <i>Pearsons's r</i>   | <b>-0.947***</b>  | <b>-0.514*</b>  | 0.146             | 0.468           |
|              | <i>p-value</i>        | <b>&lt; 0.001</b> | <b>0.031</b>    | 0.563             | 0.067           |
|              | <i>Spearman's rho</i> | <b>-0.971***</b>  | <b>-0.505</b>   | 0.170             | 0.598*          |
| TCI – RD3    | <i>p-value</i>        | <b>&lt; 0.001</b> | <b>0.065</b>    | 0.499             | 0.024           |
|              | <i>Pearsons's r</i>   | -0.560            | -0.180          | 0.273             | -0.006          |
|              | <i>p-value</i>        | 0.058             | 0.537           | 0.244             | 0.983           |
| TCI – RD TOT | <i>Spearman's rho</i> | -0.500            | -0.055          | 0.301             | 0.018           |
|              | <i>p-value</i>        | 0.098             | 0.852           | 0.266             | 0.950           |
|              | <i>Pearsons's r</i>   | -0.907***         | -0.220          | 0.036             | 0.020           |

|              |                       |           |           |         |           |
|--------------|-----------------------|-----------|-----------|---------|-----------|
|              | <i>p-value</i>        | < 0.001   | 0.412     | 0.887   | 0.955     |
|              | <i>Spearman's rho</i> | -0.943*** | -0.357    | 0.151   | 0.178     |
|              | <i>p-value</i>        | <0 .001   | 0.210     | 0.551   | 0.452     |
| TCI – P      | <i>Pearsons's r</i>   | -0.042    | -0.769*** | 0.303   | 0.686**   |
|              | <i>p-value</i>        | 0.888     | <0 .001   | 0.195   | 0.003     |
|              | <i>Spearman's rho</i> | -0.042    | -0.661**  | 0.410   | 0.568*    |
| TCI – SD1    | <i>p-value</i>        | 0.888     | 0.010     | 0.091   | 0.034     |
|              | <i>Pearsons's r</i>   | 0.157     | 0.251     | -0.288  | 0.355     |
|              | <i>p-value</i>        | 0.592     | 0.349     | 0.218   | 0.178     |
| TCI – SD2    | <i>Spearman's rho</i> | 0.131     | 0.134     | -0.129  | 0.400     |
|              | <i>p-value</i>        | 0.685     | 0.649     | 0.606   | 0.156     |
|              | <i>Pearsons's r</i>   | 0.036     | 0.342     | 0.475*  | 0.429     |
| TCI – SD3    | <i>p-value</i>        | 0.903     | 0.194     | 0.034   | 0.097     |
|              | <i>Spearman's rho</i> | -0.029    | 0.436     | 0.650** | 0.272     |
|              | <i>p-value</i>        | 0.928     | 0.119     | 0.004   | 0.346     |
| TCI – SD4    | <i>Pearsons's r</i>   | -0.044    | 0.179     | -0.054  | 0.506*    |
|              | <i>p-value</i>        | 0.881     | 0.508     | 0.820   | 0.045     |
|              | <i>Spearman's rho</i> | -0.135    | 0.223     | 0.218   | 0.489     |
| TCI – SD5    | <i>p-value</i>        | 0.675     | 0.444     | 0.385   | 0.076     |
|              | <i>Pearsons's r</i>   | 0.830***  | 0.585*    | 0.133   | 0.032     |
|              | <i>p-value</i>        | < 0.001   | 0.028     | 0.575   | 0.906     |
| TCI – SD TOT | <i>Spearman's rho</i> | 0.714**   | 0.679*    | -0.117  | -0.143    |
|              | <i>p-value</i>        | 0.009     | 0.008     | 0.643   | 0.627     |
|              | <i>Pearsons's r</i>   | 0.721**   | -0.019    | 0.195   | 0.322     |
| TCI – SC1    | <i>p-value</i>        | 0.004     | 0.943     | 0.411   | 0.224     |
|              | <i>Spearman's rho</i> | 0.725**   | 0.324     | -0.077  | 0.108     |
|              | <i>p-value</i>        | 0.008     | 0.258     | 0.763   | 0.713     |
| TCI – SC2    | <i>Pearsons's r</i>   | 0.618*    | 0.391     | 0.157   | 0.336     |
|              | <i>p-value</i>        | 0.019     | 0.134     | 0.509   | 0.203     |
|              | <i>Spearman's rho</i> | 0.667*    | 0.595*    | 0.243   | 0.108     |
| TCI – SC3    | <i>p-value</i>        | 0.018     | 0.025     | 0.332   | 0.713     |
|              | <i>Pearsons's r</i>   | 0.151     | 0.162     | 0.442   | -0.085    |
|              | <i>p-value</i>        | 0.606     | 0.580     | 0.051   | 0.753     |
| TCI – SC4    | <i>Spearman's rho</i> | 0.116     | -0.145    | 0.547*  | 0.091     |
|              | <i>p-value</i>        | 0.720     | 0.620     | 0.019   | 0.757     |
|              | <i>Pearsons's r</i>   | -0.209    | 0.215     | 0.435   | 0.232     |
| TCI – SC5    | <i>p-value</i>        | 0.474     | 0.424     | 0.071   | 0.424     |
|              | <i>Spearman's rho</i> | 0.029     | 0.306     | 0.219   | 0.234     |
|              | <i>p-value</i>        | 0.929     | 0.287     | 0.382   | 0.421     |
| TCI – SC TOT | <i>Pearsons's r</i>   | -0.695**  | -0.049    | 0.229   | -0.215    |
|              | <i>p-value</i>        | 0.006     | 0.857     | 0.331   | 0.424     |
|              | <i>Spearman's rho</i> | -0.463    | -0.116    | 0.177   | -0.116    |
| TCI – T1     | <i>p-value</i>        | 0.130     | 0.924     | 0.481   | 0.694     |
|              | <i>Pearsons's r</i>   | 0.263     | 0.776***  | 0.235   | -0.237    |
|              | <i>p-value</i>        | 0.408     | <0 .001   | 0.318   | 0.378     |
| TCI – T2     | <i>Spearman's rho</i> | 0.147     | 0.826***  | 0.034   | -0.257    |
|              | <i>p-value</i>        | 0.648     | <0 .001   | 0.893   | 0.376     |
|              | <i>Pearsons's r</i>   | -0.463    | -0.258    | 0.576*  | 0.469     |
| TCI – T3     | <i>p-value</i>        | 0.096     | 0.373     | 0.012   | 0.067     |
|              | <i>Spearman's rho</i> | -0.339    | -0.075    | 0.468   | 0.374     |
|              | <i>p-value</i>        | 0.280     | 0.799     | 0.050   | 0.088     |
| TCI – T4     | <i>Pearsons's r</i>   | -0.197    | 0.204     | 0.456*  | 0.062     |
|              | <i>p-value</i>        | 0.499     | 0.450     | 0.044   | 0.820     |
|              | <i>Spearman's rho</i> | -0.145    | 0.270     | 0.351   | 0.234     |
| TCI – T5     | <i>p-value</i>        | 0.653     | 0.350     | 0.153   | 0.421     |
|              | <i>Pearsons's r</i>   | 0.165     | 0.581*    | -0.324  | -0.922*** |
|              | <i>p-value</i>        | 0.001     | 0.001     | 0.001   | 0.001     |

|             |                       |        |        |                |                   |
|-------------|-----------------------|--------|--------|----------------|-------------------|
|             | <i>p-value</i>        | 0.572  | 0.018  | 0.164          | < 0.001           |
|             | <i>Spearman's rho</i> | 0.174  | 0.414* | -0.324         | -0.954***         |
| TCI – T2    | <i>p-value</i>        | 0.589  | 0.141  | 0.164          | < 0.001           |
|             | <i>Pearson's r</i>    | -0.200 | 0.016  | -0.376         | -0.568*           |
|             | <i>p-value</i>        | 0.494  | 0.952  | 0.102          | 0.022             |
|             | <i>Spearman's rho</i> | -0.265 | -0.168 | -0.518*        | -0.355            |
| TCI – T3    | <i>p-value</i>        | 0.406  | 0.565  | 0.028          | 0.213             |
|             | <i>Pearson's r</i>    | -0.200 | 0.151  | <b>-0.530*</b> | <b>-0.790***</b>  |
|             | <i>p-value</i>        | 0.534  | 0.697  | <b>0.016</b>   | <b>&lt; 0.001</b> |
|             | <i>Spearman's rho</i> | -0.145 | 0.151  | <b>-0.580*</b> | <b>-0.666**</b>   |
| TCI – T TOT | <i>p-value</i>        | 0.653  | 0.697  | <b>0.012</b>   | <b>&lt; 0.009</b> |
|             | <i>Pearson's r</i>    | -0.013 | 0.320  | <b>-0.460*</b> | <b>-0.877***</b>  |
|             | <i>p-value</i>        | 0.969  | 0.264  | <b>0.041</b>   | <b>&lt; 0.001</b> |
|             | <i>Spearman's rho</i> | -0.029 | 0.107  | <b>-0.433</b>  | <b>-0.749**</b>   |
|             | <i>p-value</i>        | 0.930  | 0.715  | <b>0.072</b>   | <b>&lt; 0.002</b> |

\* p < .05, \*\* p < .01, \*\*\* p < .001.

#### S6. Ophthalmological evaluation of patient group

Twenty patients affected by GO (all female; mean age:  $43 \pm 16$  years) and ten healthy subjects (all female; mean age:  $38 \pm 18$  years) were enrolled in this study. Both groups were homogeneous for gender and age and their demographical characteristic (Table S1).

Control group (HC) showed normal values of peripheral thyroid and absence of serological TRAb. Normal visual acuity, values of bulbar proptosis ( $15.2 \pm 1.3$  mm) and normal ocular evaluation were also observable in HC. Specific ocular findings of the GO patient group are reported in Table 1.

The subgroup analysis (by CAS, group I:  $CAS < 3$ , n=8; group II:  $CAS \geq 3$ , n=12) was performed.

A correlation between CAS and proptosis value was found (Pearson's  $r = 0.755$ ;  $p < 0.001$ ), and consequently, GO patients from group II show significant higher proptosis (proptosis =  $20.9 \pm 1.8$  mm) respect to Group I patients (proptosis =  $17.9 \pm 1.9$  mm,  $p = 0.005$ ).

**Table S6.** Demographical and ocular findings of the study population.

| Variable                             | GO (n=20)                  |
|--------------------------------------|----------------------------|
| Age, y<br>(mean±SD)                  | 43±16                      |
| Gender                               | 20 female                  |
| Smokers N.(%)                        | 10/20 (50%)                |
| GD duration (months)                 | 14.9±4.6                   |
| Peripheral thyroid function:         |                            |
| • Euthyroid (without therapy) N. (%) | 2 (10%)                    |
| • Euthyroid (ongoing therapy) N. (%) | 16 (80%)                   |
| • Hyperthyroid (with therapy) N. (%) | 2 (10%)                    |
| TRAb titer (mean±SD) U/liter         | 5.4±2.6                    |
| Duration of GO (months)              | 10.4±1.6                   |
| <b>Ophthalmological evaluation</b>   |                            |
| Visual acuity (mean±SD)              | 1±0                        |
| Proptosis mm                         | 19.1±2.4 (range 16-23 mm). |
| CAS (mean±SD)                        | 2.1±1.52 (range 0-5)       |
| $CAS \geq 3$ N. (%)                  | 8 (40%)                    |

|                            |            |
|----------------------------|------------|
| <b>Severity assessment</b> |            |
| Mild N. (%)                | 18 (90%)   |
| Moderate to severe N. (%)  | 2 (10%)    |
| Presence of diplopia N (%) | 2/20 (10%) |

**Table S7.** Summary of CANTAB neuropsychological tasks employed (modified by [57])

| <i>CANTAB tasks</i>                                 | <i>Description</i>                                                                                                                                                                                                                                                                       | <i>Performance indices</i>                                                                                                                                                         |
|-----------------------------------------------------|------------------------------------------------------------------------------------------------------------------------------------------------------------------------------------------------------------------------------------------------------------------------------------------|------------------------------------------------------------------------------------------------------------------------------------------------------------------------------------|
| Visual memory Paired Associates Learning (PAL) [54] | Episodic memory and learning. It requires subjects to learn the location of 1, 2, 3, 6, and 8 visual pattern-location pairings. For participants who fail to complete all stages, an adjusted total is calculated that allows for errors predicted in the stages that were not attempted | PAL Total errors (adjusted), PAL Total errors (six shapes, adjusted), PAL means of Tentative and PAL First trial memory score                                                      |
| Spatial Working Memory (SWM) [55]                   | Working memory capacity and strategy use. It requires subjects to “search through” boxes on the screen to find individual “blue tokens” without returning to a box where one had previously been found                                                                                   | SWM Between errors (Total) (returning to a box where a token has previously been found), the SWM Between errors (four boxes), (six boxes), and (eight boxes), and the SWM Strategy |
| Rapid Visual Information Processing (RVP) [56]      | Sustained attention. It requires subjects to detect infrequent three- digit sequences from among serially presented digits                                                                                                                                                               | RVPA’ (sensitivity to the target) and RVP Mean latency                                                                                                                             |

**Table S8.** Temperaments and Character Inventory (TCI) – Dimensions of Personality Traits

| <i>Temperaments</i>    | <i>Subscales</i>                                                                                                                                         | <i>Characters</i>              | <i>Subscales</i>                                                                                                                                                                                                            |
|------------------------|----------------------------------------------------------------------------------------------------------------------------------------------------------|--------------------------------|-----------------------------------------------------------------------------------------------------------------------------------------------------------------------------------------------------------------------------|
| Novelty Seeking (NS)   | Exploratory excitability (NS1)<br>Impulsiveness (NS2)<br>Extravagance (NS3)[3]<br>Disorderliness (NS4)                                                   | <i>Self-Directedness (SD)</i>  | Responsibility Vs. Blaming (SD1)<br>Purposefulness Vs. Lack Of Goal Direction (SD2)<br>Resourcefulness Vs. Inertia (SD3)<br>Self-Acceptance Vs. Self-Striving (SD4)<br>Congruent Second Nature Vs. Incongruent Habits (SD5) |
| Harm Avoidance (HA)    | Anticipatory worry (HA1)<br>Fear of uncertainty (HA2)<br>Shyness/Shyness with strangers (HA3)<br>Fatigability/Fatigability and asthenia (weakness) (HA4) | <i>Cooperativeness (CO)</i>    | Social acceptance vs. intolerance (C1)<br>Empathy vs. social disinterest (C2)<br>Helpfulness vs. unhelpfulness (C3)<br>Compassion vs. revengefulness (C4)<br>Principles vs. self-advantage (C5)                             |
| Reward Dependence (RD) | Sentimentality (RD1)<br>Openness to warm communication or social sensitivity (RD2)<br>Attachment (RD3)<br>Dependence on approval by others (RD4)         | <i>Self-Transcendence (ST)</i> | Self-forgetful vs. self-conscious experience (ST1)<br>Transpersonal identification vs. self-isolation (ST2)<br>Spiritual acceptance vs. rational materialism (ST3)                                                          |
| Persistence (PS)       |                                                                                                                                                          |                                |                                                                                                                                                                                                                             |
